# Supplementary figures and images for: Plastic Waste Management towards Energy Recovery during the COVID-19 Pandemic: The Example of Protective Face Mask Pyrolysis
Source: MDPI journal article supplement (doi:10.3390/en15072629), 2022-04-03

## SUPPLEMENTARY MATERIAL

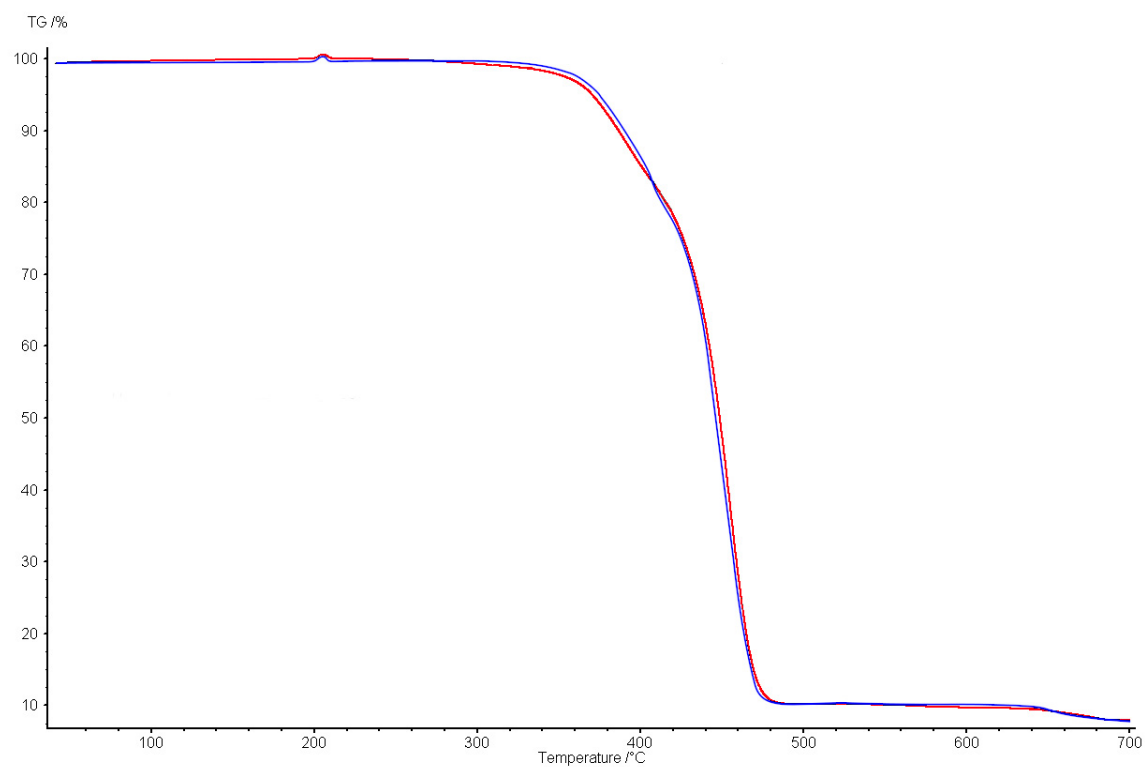

(a)

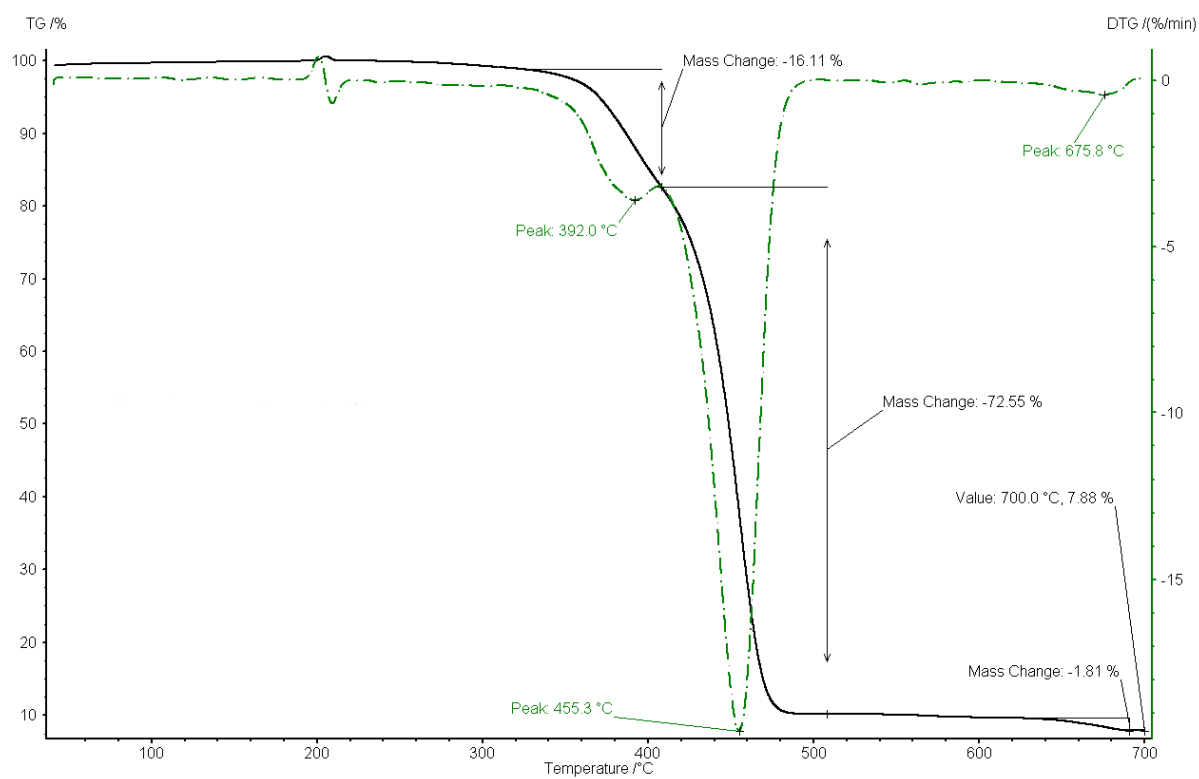

(b)

**Figure S1.** Comparison of repeated TG curves (a) and the TG and DTG curve (b).

Supplement: s1 [file s1]
